# Supplementary material
Source: publisher figshare collection journal article supplement (https://acs.figshare.com/ndownloader/files/27394663)
Supplement: Supplementary file 1 [file 27394663]

## Supplementary Information: Density functional theory studies on sulfur-poly(acrylonitrile) as a cathode host material for lithium-sulfur batteries

Samuel Bertolini<sup>a</sup> and Timo Jacob<sup>abc\*</sup>

[a] Dr. Samuel Bertolini and Prof. Dr. T.Jacob, Institute of Electrochemistry Ulm University Albert-Einstein-Allee 47, 89081 Ulm (Germany) E-mail: [samuel.bertolini-da-silva@uni-ulm.de](mailto:samuel.bertolini-da-silva@uni-ulm.de)

[b] Prof. Dr. T. Jacob, Helmholtz-Institute Ulm (HIU) Electrochemical Energy Storage Helmholtzstr.11, 89081 Ulm (Germany) E-mail: [timo.jacob@uni-ulm.de](mailto:timo.jacob@uni-ulm.de)

[c] Prof. Dr. T. Jacob, Karlsruhe Institute of Technology (KIT) P.O. Box 3640, 76021 Karlsruhe (Germany)

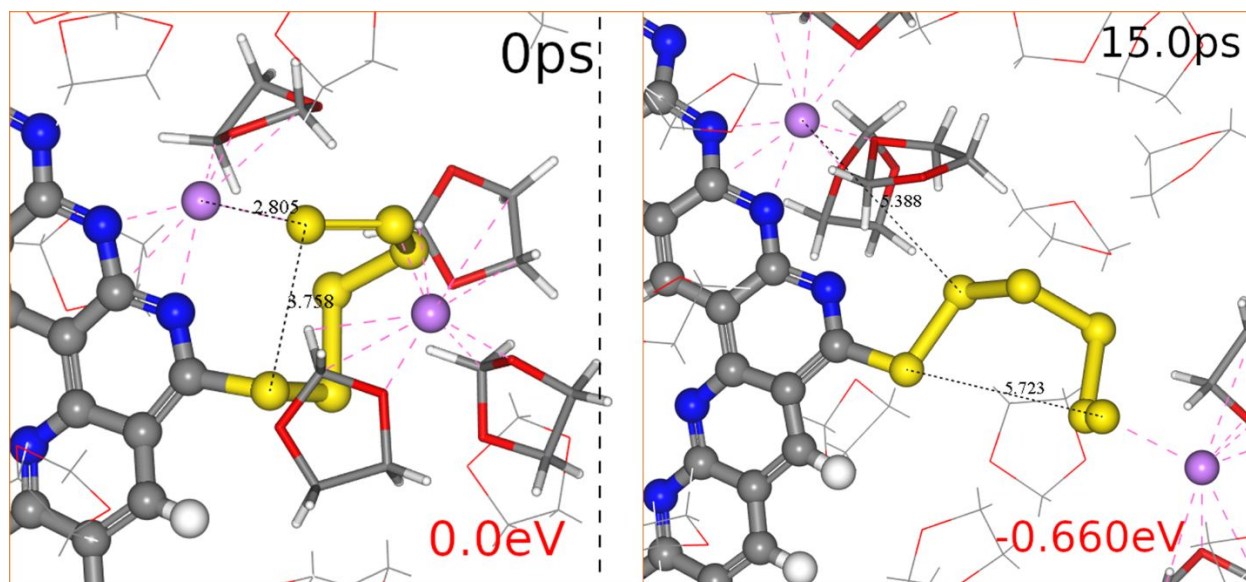

**Figure S1:** Evolution of the system, where initially the PS is attached to the polymer. As described in **Figure 1A**. Color coding is described in **Figure 1**.

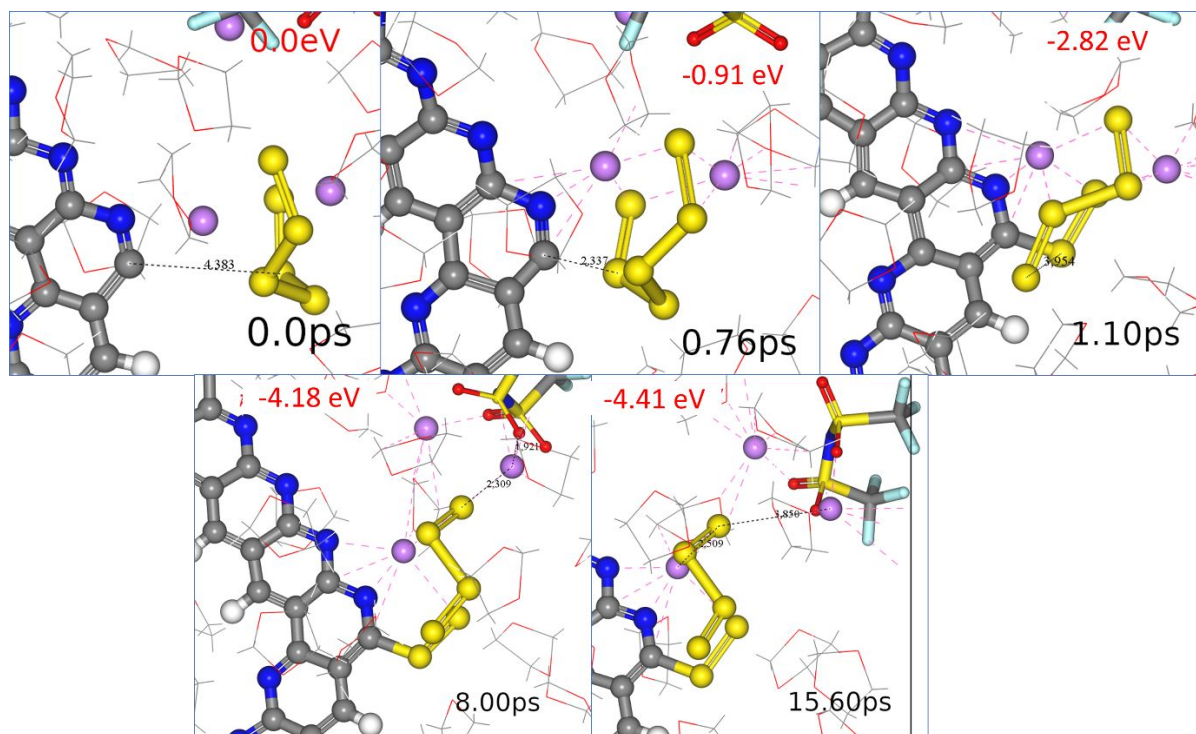

**Figure S2:** Configuration of the AIMD over time, the system that contains the PS and LiTFSI, where PS is not attached, but it is close to the  $C_{uc}$ .

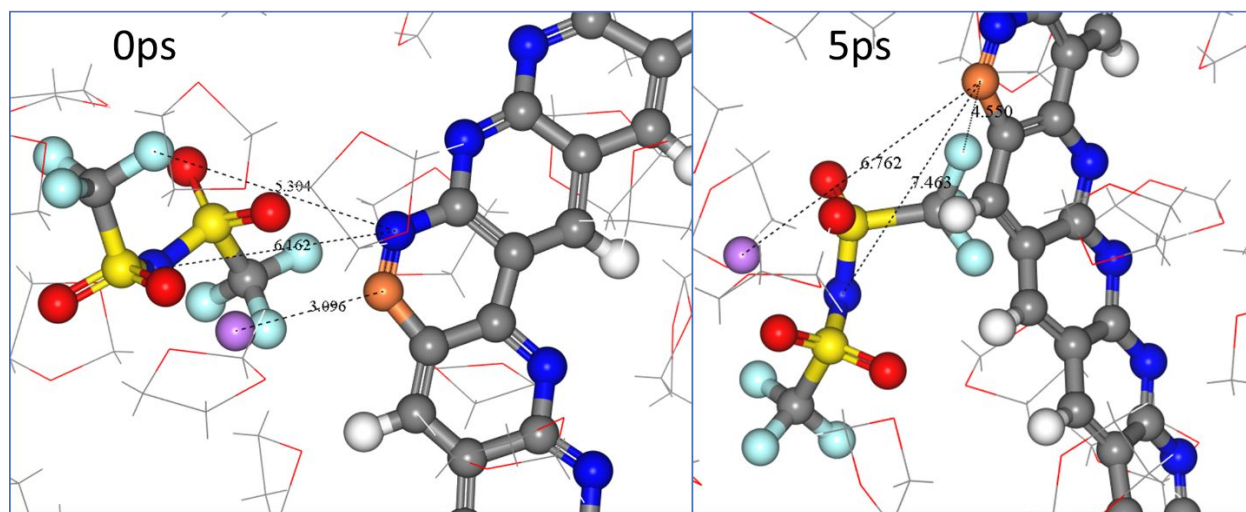

**Figure S3:** Ab Initio Molecular dynamics when LiTFSI is initially set close to the empty site. The color code is described in [Figure 1](#), but the empty site is highlighted in orange.

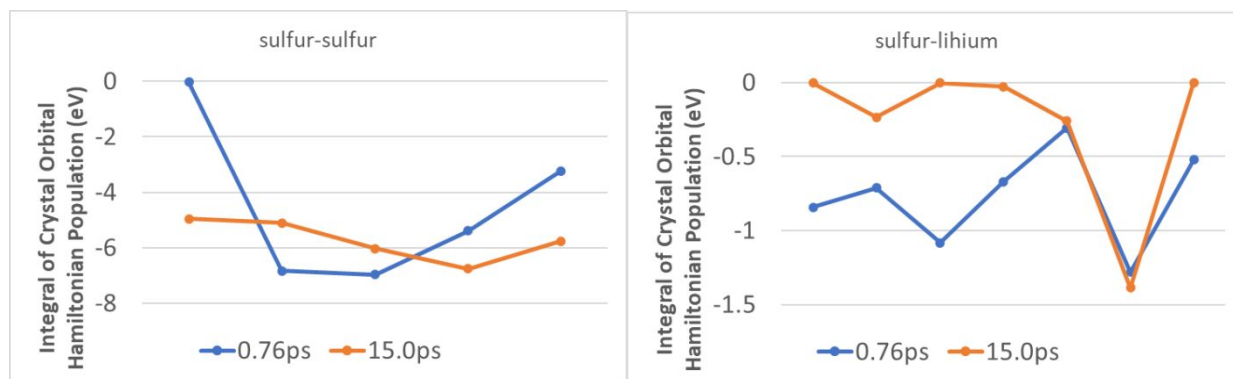

**Figure S4:** Integral of the Crystal Orbital Hamiltonian Population of C-H bonds that belongs to the system represented in **Figure 1a**.
